# Supplementary material
Source: PubMed Central journal article supplement (PMC4812828)
Supplement: NIHMS771421-supplement-2.pdf [file NIHMS771421-supplement-2.pdf]

## Structure of the eukaryotic replicative CMG helicase and pumpjack motion

Zuanning Yuan, Lin Bai, Jingchuan Sun, Roxana Georgescu, Jun Liu, Michael E. O'Donnell, Huilin Li

**Supplemental Table 1. Cryo-EM data collection and refinement statistics**

| <b>Data Collection</b>                          |                 |                 |                 |
|-------------------------------------------------|-----------------|-----------------|-----------------|
| EM equipment                                    | FEI Titan Krios | FEI Titan Krios | FEI Titan Krios |
| Voltage (kV)                                    | 300             | 300             | 300             |
| Detector                                        | Gatan K2        | Gatan K2        | Gatan K2        |
| Pixel size (Å)                                  | 1.01            | 1.01            | 1.01            |
| Electron dose (e <sup>-</sup> /Å <sup>2</sup> ) | 50              | 50              | 50              |
| Defocus range (μm)                              | 1.5~3.5         | 1.5~3.5         | 1.5~3.5         |
| <b>3D Reconstruction</b>                        |                 |                 |                 |
| Software                                        | RELION 1.4      | RELION 1.4      | RELION 1.4      |
| Number of particles used                        | 469, 818        | 86,822          | 178, 530        |
| Resolution (Å)                                  | 3.7             | 4.7             | 4.8             |
| B-factor sharpening (Å <sup>2</sup> )           | -144            | -124            | -117            |
| <b>Model composition</b>                        |                 |                 |                 |
| Peptide chains                                  | 11              | 11              | 11              |
| Protein residues                                | 2881            | 4931            | 4972            |
| <b>R.m.s deviations</b>                         |                 |                 |                 |
| Bonds length (Å)                                | 0.008           | 0.008           | 0.009           |
| Bonds angle                                     | 1.376°          | 1.371°          | 1.412°          |
| <b>Ramachandran plot</b>                        |                 |                 |                 |
| Preferred (%)                                   | 89.39           | 89.03           | 90.14           |
| Allowed (%)                                     | 9.61            | 9.27            | 8.53            |
| Outlier (%)                                     | 1.00            | 1.70            | 1.33            |
| <b>Validation</b>                               |                 |                 |                 |
| Molprobit score                                 | 2.62 (97%)      | 2.71 (95%)      | 2.64(97%)       |
| Rotamer outliers (%)                            | 0.23            | 0.25            | 0.13            |
